# Supplementary material for: The carbon budget of terrestrial ecosystems in East Asia over the last two decades
Source: Copernicus journal article supplement (doi:10.5194/bg-9-3571-2012), 2012-09-07
Supplement: Supplementary file 1 [file bg-9-3571-2012-supplement.pdf]

### **Text S1. Estimation on change in shrub and grassland biomass**

The change in shrub and grassland biomass over East Asia during 1990-2009 was estimated using an empirical approach developed by Piao et al. (2007) and Piao et al. (2009). In this approach, we extrapolated relationships between Normalized Difference Vegetation Index (NDVI) and observed aboveground biomass carbon density of shrublands (Eq. 1) and grasslands (Eq. 2) to all shrubland and grassland area over East Asia, respectively, resulting in the spatial-temporal change in shrubland and grassland biomass during 1990-2009.

$$\text{BCD}_s = 3114.2 \times \text{NDVI}_s^{2.3705} \quad (\text{Eq. 1})$$

Where  $\text{BCD}_s$  is the biomass carbon density of shrublands ( $\text{g C m}^{-2}$ ) and  $\text{NDVI}_s$  is the mean growing season (April - October) NDVI of shrublands.

$$\text{BCD}_g = 291.64 \times \text{NDVI}_g^{1.5842} \quad (\text{Eq. 2})$$

Where  $\text{BCD}_g$  is the biomass carbon density of grasslands ( $\text{g C m}^{-2}$ ) and  $\text{NDVI}_g$  is the mean growing season (April - October) NDVI of grasslands.

**Table S1.** Change in forest area and forest biomass carbon stock during 1990-2009 for each country in East Asia. Data are provided by FAO (2010).

| <b>Country</b> | <b>Forest Area Change<br/>(km<sup>2</sup> per year)</b> | <b>Biomass Carbon Stock Change<br/>(Pg C yr<sup>-1</sup>)</b> |
|----------------|---------------------------------------------------------|---------------------------------------------------------------|
| China          | 24860                                                   | 0.09                                                          |
| Japan          | 15                                                      | 0.02                                                          |
| Mongolia       | -819                                                    | -0.004                                                        |
| North Korea    | -1268                                                   | -0.003                                                        |
| South Korea    | -74                                                     | 0.008                                                         |
| Overall        | 22714                                                   | 0.11                                                          |

**Table S2.** Carbon balance of different components of terrestrial territory in East Asia estimated using different approaches.

| <b>Method</b>                                  | <b>Component</b>                                  |           | <b>Carbon balance<br/>(Pg C yr<sup>-1</sup>)</b> | <b>Reference</b>      |
|------------------------------------------------|---------------------------------------------------|-----------|--------------------------------------------------|-----------------------|
| Inventory and<br>satellite based<br>estimation | Vegetation                                        | Forest    | -0.11 ± 0.006                                    | FAO, 2010             |
|                                                |                                                   | Shrub     | -0.024 ± 0.011                                   | This study            |
|                                                | Soil                                              | Grassland | 0.001 ± 0.001                                    | This study            |
|                                                |                                                   | Forest    | -0.014 ± 0.009                                   | This study            |
|                                                |                                                   | Shrub     | -0.022 ± 0.028                                   | This study            |
|                                                |                                                   | Grassland | 0.003 ± 0.004                                    | This study            |
|                                                |                                                   | Cropland  | -0.022 ± 0.004                                   | Huang et al., 2006    |
|                                                | Dead wood                                         |           | -0.032                                           | Pan et al., 2011      |
|                                                | DOC & POC                                         |           | -0.019                                           | Mayorga et al., 2010  |
|                                                | DIC                                               |           | -0.029                                           | Hartmann et al., 2009 |
|                                                | Litter                                            |           | -0.012                                           | Pan et al., 2011      |
|                                                | Wood products                                     |           | -0.013 ± 0.002                                   | This study            |
|                                                | Total                                             |           | -0.293 ± 0.033                                   |                       |
| Process model<br>based estimation              | CO <sub>2</sub> fertilization & Climate<br>Change |           | -0.289 ± 0.135                                   | This study            |

**Table S2.** Continued

| <b>Method</b>                                | <b>Component</b>                   | <b>Carbon balance<br/>(Pg C yr<sup>-1</sup>)</b> | <b>Reference</b>                    |
|----------------------------------------------|------------------------------------|--------------------------------------------------|-------------------------------------|
|                                              | Nitrogen deposition                | -0.107 ± 0.025                                   | Tian et al., 2011; Mao et al., 2012 |
|                                              | Land use change                    | -0.013 ± 0.029                                   | This study                          |
|                                              | Troposphere O <sub>3</sub>         | 0.02                                             | Tian et al., 2011                   |
|                                              | Agriculture management             | -0.022 ± 0.004                                   | Huang et al., 2010                  |
|                                              | Wildfire                           | 0.018 ± 0.010                                    | Van der Werf et al., 2010           |
|                                              | Chemical weathering                | 0.020                                            | Hartmann et al. 2009                |
|                                              | Biofuel                            | 0.189 ± 0.010                                    | Wang et al., 2012                   |
|                                              | Total (including biofuel emission) | -0.224 ± 0.141                                   |                                     |
|                                              | Total (excluding biofuel emission) | -0.413 ± 0.141                                   |                                     |
| Atmospheric<br>inversion based<br>estimation | Net CO <sub>2</sub> exchange       | -0.380 ± 0.507                                   | This study                          |
|                                              | Food & wood trade                  | -0.04                                            | This study                          |
|                                              | Non-CO <sub>2</sub> emission       | 0.15                                             | Folberth et al., 2005               |
|                                              | Total                              | -0.270 ± 0.507                                   |                                     |

## References

- FAO, Food and Agriculture Organization: Global Forest Resources Assessment. FAO, Rome, Italy, 2010.
- Folberth, G. A., D. A. Hauglustaine, J. Lathière, and F. Brocheton: Impact of biogenic hydrocarbons on tropospheric chemistry: results from a global chemistry-climate model, *Atmos. Chem. Phys. Discuss.*, 5, 10517–10612, 2005.
- Hartmann, J., Jansen, N., Kempe, S., Dürr, H.H., Köhler, P. (2009) Global CO<sub>2</sub>-consumption by chemical weathering: What is the contribution of highly active weathering regions? *Global and Planetary Change*, 69, 185-194. doi: 10.1016/j.gloplacha.2009.07.007
- Huang, Y., and Sun, W.: Changes in topsoil organic carbon of croplands in mainland China over the last two decades, *Chinese Sci. Bull.*, 51, 1785-1803, doi:10.1007/s11434-006-2056-6, 2006.
- Mao, J.F., Shi, X.Y., Thornton, P.E., Piao S.L., and Wang, X.H.: Causes of spring vegetation growth trends in the northern mid–high latitudes from 1982 to 2004, *Environ. Res. Lett.*, 7, 014010, doi:10.1088/1748-9326/7/1/014010, 2012.
- Mayorga E., Seitzinger S. P., Harrison J. A., Dumont E., Beusen A., Bouwman A. F., Fekete B. M., Kroeze C., and Van Drecht G.: Global Nutrient Export from WaterSheds 2 (NEWS 2): Model development and implementation. *Environ. Modell. Softw.* 25:837-853, doi:10.1016/j.envsoft.2010.01.007, 2010
- Meybeck, M., Durr, H. H., and Vorosmarty, C. J.: Global coastal segmentation and its river catchment contributors: A new look at land-ocean linkage, *Global Biogeochem. Cy.*, 20, doi:10.1029/2005gb002540, 2006.
- Pan, Y. D., Birdsey, R. A., Fang, J. Y., Houghton, R., Kauppi, P. E., Kurz, W. A., Phillips, O. L., Shvidenko, A., Lewis, S. L., Canadell, J. G., Ciais, P., Jackson, R. B., Pacala, S. W., McGuire, A. D., Piao, S. L., Rautiainen, A., Sitch, S., and Hayes, D.: A Large and Persistent Carbon Sink in the World's Forests, *Science*, 333, 988-993, doi:10.1126/science.1201609, 2011.
- Piao, S. L., Fang, J. Y., Zhou, L. M., Tan, K., and Tao, S.: Changes in biomass carbon stocks in china's grasslands between 1982 and 1999, *Global Biogeochem. Cy.*, 21,0.1029/2005gb002634, 2007.

- Piao, S., Fang, J., Ciais, P., Peylin, P., Huang, Y., Sitch, S., and Wang, T.: The carbon balance of terrestrial ecosystems in china, *Nature*, 458, 1009-1013, 2009.
- Tian, H. Q., Melillo, J., Lu, C. Q., Kicklighter, D., Liu, M. L., Ren, W., Xu, X. F., Chen, G. S., Zhang, C., Pan, S. F., Liu, J. Y., and Running, S.: China's terrestrial carbon balance: Contributions from multiple global change factors, *Global Biogeochem. Cy.*, 25, doi:10.1029/2010gb003838, 2011.
- Wang, R., Tao, S., Shen, H., Huang, Y., Shen, G., Wang, B., Li, W., Zhang, Y., Lu. Y., Zhu, D., Liu, X., Wang, W., Wang, X., Piao, S., and Ciais, P.: High resolution mapping of combustion processes and implications for CO<sub>2</sub> emissions, submitted.
- van der Werf, G. R., Randerson, J. T., Giglio, L., Collatz, G. J., Mu, M., Kasibhatla, P. S., Morton, D. C., DeFries, R. S., Jin, Y., and van Leeuwen, T. T.: Global fire emissions and the contribution of deforestation, savanna, forest, agricultural, and peat fires (1997-2009), *Atmos. Chem. Phys.*, 10, 11707-11735, doi:10.5194/acp-10-11707-2010, 2010.
